# Supplementary material for: CRISPR/Cas9 mediated genetic resource for unknown kinase and phosphatase genes in Drosophila
Source: PubMed Central journal article supplement (PMC7193564; doi:10.1038/s41598-020-64253-4), 2020-04-30
Supplement: 41598_2020_64253_MOESM1_ESM.pdf [file 41598_2020_64253_MOESM1_ESM.pdf]

# **CRISPR/Cas9-mediated genetic resource for unknown kinase and phosphatase genes in *Drosophila***

Menghua Wu<sup>1,2</sup>, Xuedi Zhang<sup>2</sup>, Wei Wei<sup>1</sup>, Li Long<sup>1</sup>, Sainan An<sup>3</sup> and Guanjin Gao<sup>2,1,\*</sup>

<sup>1</sup> School of Life Sciences, Tsinghua University, Beijing, 100084, PR China

<sup>2</sup> School of Life Science and Technology, ShanghaiTech University, Shanghai, 201210, PR China

<sup>3</sup> National Institute of Biological Sciences, Beijing, 102206, PR China

\* Corresponding: gaogj@shanghaitech.edu.cn

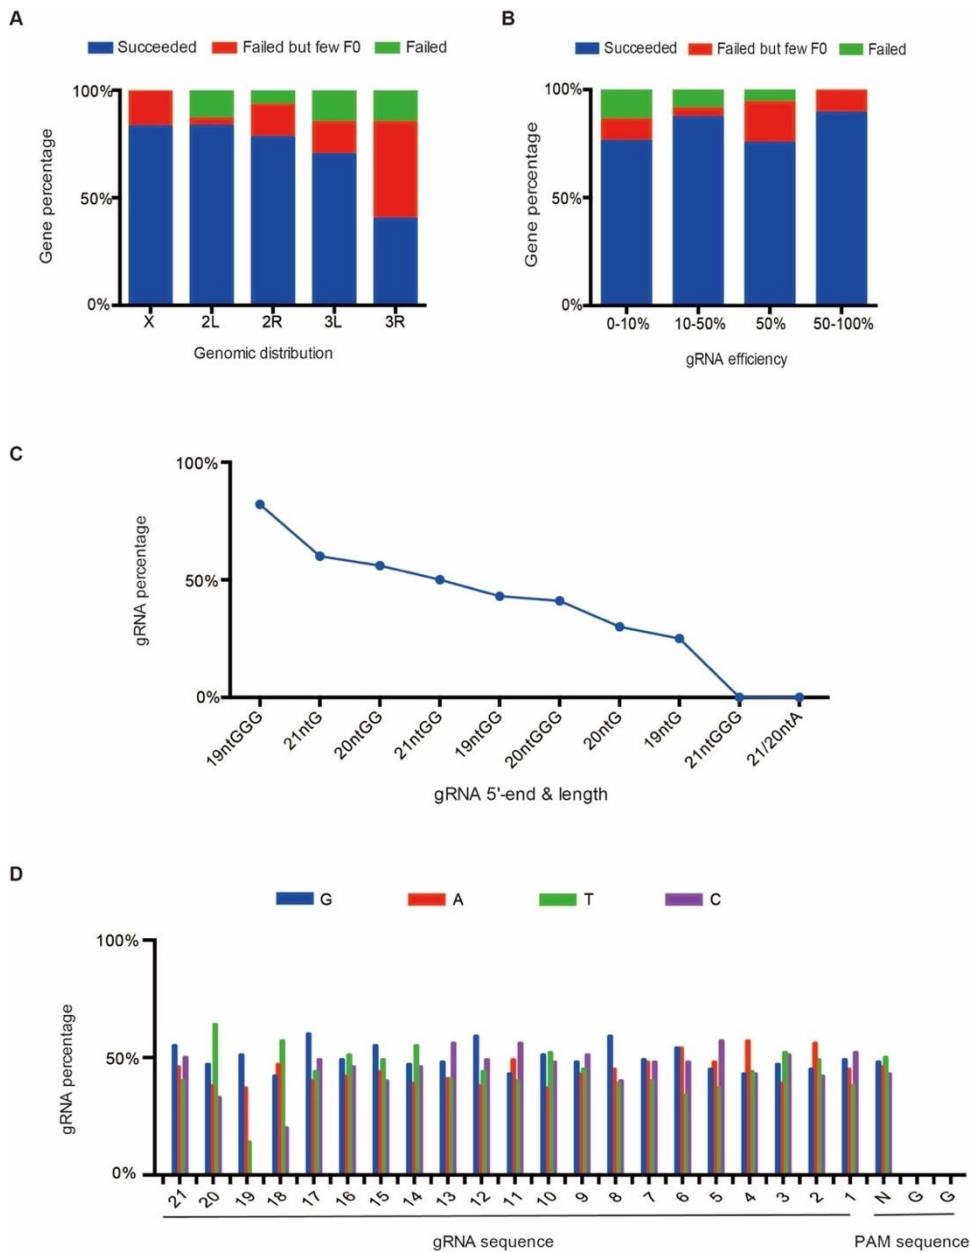

**Supplementary Figure 1. CRISPR/Cas9-mediated mutagenesis efficiency.** (A) Mutant yield of different genomic subgroups classified by whether stable mutants were successfully generated. The high percentage of too few F0s in group 3R might be due to the injection of FRT82B flies. (B) The gene percentage of different levels of gRNA efficiency by whether stable mutants were generated. The gRNA efficiency was defined based on a T7E1 assay activity with dead injected F0 larvae and classified by different levels of activity (Supplementary Figure 1C). (C) The gRNA percentage of different 5'-end "G"s by whether mutations at the gRNA recognition site were detected. (D) The gRNA percentage at different positions in the gRNA and PAM sequence by whether mutations at the gRNA recognition site were detected. Twenty-one nt of the gRNA sequence was calculated, and the original genomic sequence was added in the case of 19-20 nt gRNA, with the data at positions 21 and 20 as a reference.

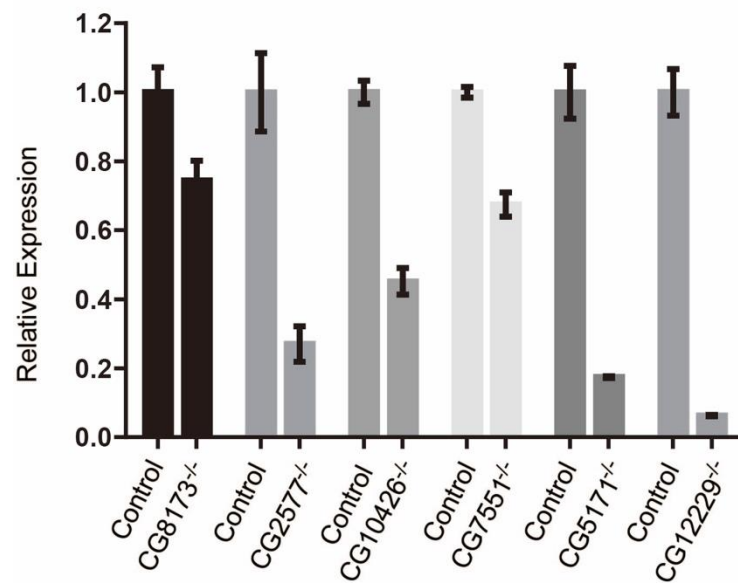

**Supplementary Figure 2. Random qRT-PCR verification of our resource.** CG8173, CG2577, CG10426, CG7551, CG5171 and CG12229 mRNA levels were quantified by qRT-PCR for control, CG8173<sup>-/-</sup>, CG2577<sup>-/-</sup>, CG10426<sup>-/-</sup>, CG7551<sup>-/-</sup>, CG5171<sup>-/-</sup> and CG12229<sup>-/-</sup>, respectively. Error bars represent the means  $\pm$  SD values of three independent experiments.

**A**

CG12229-wt TGCAGAGAGGGAACACGTCTGACAACGGCTTGGC  
 CG12229-m1 (Viable) TGCAGAGAGGGAACACGTCT-----ACTGGCTTGGC  
 CG12229-m2 (Lethal) TGCAGAGAGGGAACACGTCTGg--AACTGGCTTGGC

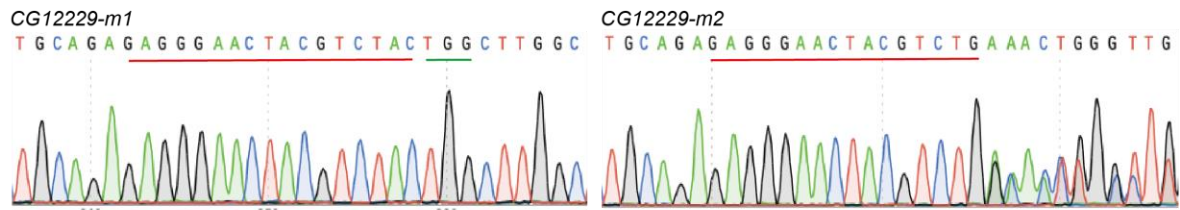

**B**

CG17027-wt TATTGGCCAGATACCCGGATCACAAAGTTCATCGGC  
 CG17027-m1 (Viable) TATTGGCCAGAT-----CACAAAGTTCATCGGC  
 CG17027-m2 (Lethal) TATTGGCCAGAT-----CACAAAGTTCATCGGC

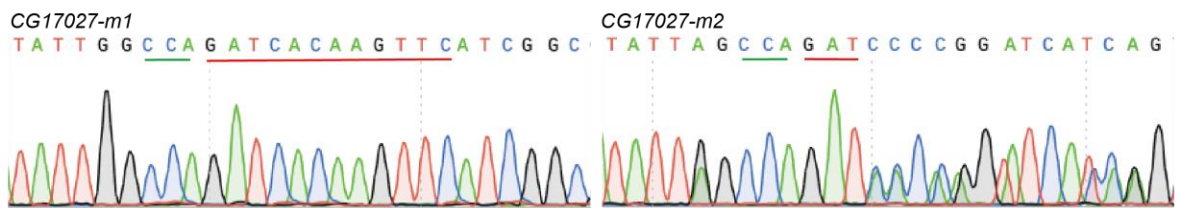

**C**

|                             |                              |                             |
|-----------------------------|------------------------------|-----------------------------|
| CG17028-wt                  | CG17028-m1 (Lethal)          | CG17028-m2 (Lethal)         |
| TGGTCAGGAAGTGCGGTCCGCTCTTT  | TGGTCAGGAAGTGCGGTCCGCTC----- | TGGTCAGGAAGTGCGGTCCGCTCTTT  |
| TTGGAGGGTTTCCAGAAACCGAAAAC  | -----                        | TTGGAGGGTTTCCAGAAACCGAAAAC  |
| CGATTACGAAGTCAAGTCAGCGTTCTA | -----                        | CGATTACGAAGTCAAGTCAGCGTTCTA |
| TGACTTGGTCACCGGTGTACGACAAGC | -----atgggaccggtccggtcatc--- | TGACTTGGTCACCGGTGTACGACAAGC |
| AAATAGAAGCCACTCTAACAGATGGTT | -----                        | AAATAGAAGCCACTCTAACAGATGGTT |
| TGCTAAAGACCTTTCCGGAATCCAAAA | -----                        | TGCTAAAGACCTTTCCGGAATCCAAAA |
| TAATAGGCGAAGAAGCTATGGCCAACG | -----                        | TAATAGGCGAAGAAGCTATGGCCAACG |
| CCAAACGCCGCCTGAGTTGACGGAT   | -----                        | CCAAACGCCGCCTGAGTTGACGGAT   |
| GCCCCACTTGGATCATA           | -----ATCATA                  | GCCCCACTTGGATCATA           |

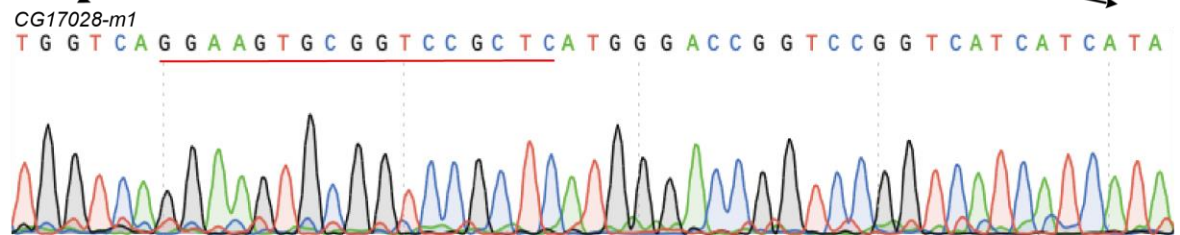

**Supplementary Figure 3. Abnormal lethal events in the CRISPR/Cas9 resource.** (A, B) Example frameshift viable and lethal allele sequences for the same gene. Red area, predicted gRNA recognition site. Green area, PAM sequence. (C) Large deletion of CG17028-m1 sequenced by gel purification of the lower PCR product from heterozygous F2. All DNA sequences were obtained from the flybase website (flybase.org) and the alignments were performed by CLUSTALW.

**Supplementary Note 1: Targeted indel mutations mediated by Cas9/gRNA at 385 mutant alleles for 105 genes.**

Note: wt, wild-type DNA sequence; m#, mutation line# DNA sequence. Deletions are shown as red dashes and insertions as highlighted in blue and lowercase letters. The change of DNA length (in nucleotides) caused by each mutation is indicated as purple (+, insertion; -, deletion). Note that some alterations have both insertions and deletions of nucleotides and in these cases the alterations are enumerated in the brackets. All DNA sequences were obtained from the flybase website (flybase.org) and the alignments were performed by CLUSTALW.

CG10702-wt  
GGCAACATGCTGCTGGGCGTTGGCCTCATGTTCTGCGCTATATGTCCCCTGCGCCGAA.....ATGTTCCC  
GCACCTGACCGTC  
CG10702-m1  
GGCAACATGCTGCTGGGCGTTGGCCTCATG-----.....CACCTGACCGTC [-258]  
CG10702-m2  
GGCAACATGCTGCTGGGCGTTGGCCTCATG-----.....CACCTGACCGTC [-258]  
CG10702-m3  
GGCAACATG-----aCATaTaTaTGGCGCTATATGTCCCCTGCGCCGAA.....ATGTTCCCGCACCTGACC  
GTC [-20,+4]

CG11221-wt  
TCGATCCTTCGCGACGGTGGTAGCACCAAC.....AGCGTGAGCCGCGGAGCAGCATCTACAAGAAGCCG  
GACAAGAATGACGGCGGACAGATCCATCTCATTCCGGACGTGGAGCTGCCGCTGATGACCTT  
CG11221-m1  
TCGATCCTTCGCGACGGTGGTAGCACCAAC.....AGCGTGAGCCGCGGAGCAGCATCTACAAGAAGCCG  
GACAAGAATGACGGCGGACAG-----ATTCCGGATGTGGAGCTGCCGCTGATGACCTT [-9]  
CG11221-m2  
TCGATCCTTCGG-----TGGTAGCACCAAC.....AGCGTGAGCCGCGGAGCAGCATCTACAAGAAGCCGACA  
AGAATGACGGCGGACAGATCCATCTCATTCCGGACGTGGAGCTGCCGCTGATGACCTT [-6]  
CG11221-m4  
TCGATCCTTCG---ACGGTGGTAGCACCAAC.....AGCGTGAGCCGCGGAGCAGCATCTACAAGAAGCCGGA  
CAAGAATGACGGCGGACAGATCCATCT---CCGGATGTGGAGCTGCCGCTGATGACCTT [-7]  
CG11221-m6  
TCGATCCTTCGCGACGGTGGTAGCACCAAC.....AGCGTGAGCCGCGGAGCAGCATCTACAAGAAGCCG  
GACAAGAATGACGGCGGACAGATCCiTCg-ATTCCGGACGTGGAGCTGCCGCTGATGACCTT [-3,+2]

CG14006-wt  
AGCCCCACATCCAGGAAGGACAGACGCTGCTTAACATGCTGTACGTGAACAACCAGGTCC.....TGCGCCTG  
CAGATAGCCGCTGGCGAAGATTACACTCAGTATAAAGGAGCCACCGTGCG  
CG14006-m1  
AGCCCCAC-----GGAAGGACAGACGCTGCTTAACATGCTGTACGTGAACAACCAGGTCC.....TGCGCCTGCA  
GATAGCCGCTGGCGAAGATTACACTCAGTATAAAGGAGCCACCGTGCG [-5]  
CG14006-m2  
AGCCCCACATC---GAAGGACAGACGCTGCTTAACATGCTGTACGTGAACAACCAGGTCC.....TGCGCCTGCA  
GATAGCCGCTGGCGAAGATTACACTCAGTATAAAGGAGCCACCGTGCG [-3]  
CG14006-m3  
AGCCCCACATCCAG-----ACAGACGCTGCTTAACATGCTGTACGTGAACAACCAGGTCC.....TGCGCCTGCAG  
ATAGCCGCTGGCGAAGATTACACTCAGTATAAAGGAGCCACCGTGCG [-5]  
CG14006-m4  
AGCCCCACAT---GGAAGGACAGACGCTGCTTAACATGCTGTACGTGAACAACCAGGTCC.....TGCGCCTGCA  
GATAGCCGCTGGCGAAGATTACACTCAGTATAAAGGAGCCACCGTGCG [-3]  
CG14006-m5  
AGCCCCACATCCAGGAAGGACAGACGCTGCTTAACATGCTGTACGTGAACAACCAGGTCC.....TGCGCCTG  
CAGATAGCCGCTGGCGAAGATTACACTCAcTATAticGGAGCCACCGTGCG [+4,-2]

CG17010-wt  
CCGGCTTACGCAGCCCTTTCAAATGGGAAAGAAGCTGGATGTGGTTGTCTTCGGGACGGCAAACATCGAAT  
ATAT  
CG17010-m1

CCGGCTTACGCAGCCCTTTCAAATGGGAAAGAAGCTGGATGTGGTTG---TCGGGACGGCAAACATCGAATAT  
AT [-3]  
CG17010-m2  
CCGGCTTACGCAGCCCTTTCAAATGGGAAAGAAGCTGGATGTGGTTGTCTT-----CAAACATCGAATATAT [-  
8]  
CG17010-m3  
CCGGCTTACGCAGCCCTTTCAAATGGGAAAGAAGCTGGATGTGGTTGTCTTCGG-ACGGCAAACATCGAATA  
TAT [-1]

CG2964-wt  
CATGTCGTTGTCCGCGAAATCCGTGCTAAAGGAGGGCTCCACACAGCTGAGCCACATCTG.....CAACGAGG  
CGCTGGAGAGGATTCATAAGGAGACGGGCCAAATCCGAACGGTCGCCATTGC  
CG2964-m1  
CATGT-----CGGGCCAAATCCGAACGGTCGC  
CATTGC [-267]  
CG2964-m2  
CATGTCGTTGTCCGCGAAATCCGTGCTAAAGGAGGGCTCCACACAGCTGAGCCACATCTG.....CAACGAGG  
CGCTGGAGAGGATTCATAAGA---CGGGCCAAATCCGAACGGTCGCCATTGC [-3]  
CG2964-m3  
CATGTCGTTGTCCGCGAAATCCGTGCTAAAGGAGGGCTCCACACAGCTGAGCCACATCTG.....CAACGAGG  
CGCTGGAGAGGATTCATA-----CGGGCCAAATCCGAACGGTCGCCATTGC [-6]  
CG2964-m4  
CATGTCGTTGTCCGCGAAATCCGTGCTAAAGGAGGGCTCCACACAGCTGAGCCACATCTG.....CAACGAGG  
CGCTGGAGAGGATTCATAA-GAGACGGGCCAAATCCGAACGGTCGCCATTGC [-1]

CG31714-wt  
GCTGCTGACGCTCCTGCTGCCGGCGGTCTGCCACACCAGACGCCTCCAGATGCAGACCA.....CTCCTATT  
CCTCGTCCAGTCCAGGATGCGGGGGTATGCTAAAGGCACGCCATGGCAACAT  
CG31714-m1  
GCTGCTGACGCTCCTGCTGCCGGCGGTCTGCCACACCAGACGCCTCCAGATGCAGACCA.....CTCCTATT  
CCTCGTCCAGTCCAGGATGCGGGGGTATGCTAAAGG--CGCCATGGCAACAT [-2]  
CG31714-m2  
GCTGCTGACGCTCCTGCTGCCGGCGGTCTGCCACACCA-----  
-----GGCAACAT [-193]  
CG31714-m3  
GCTGCTGACGCTCCTGCTGCCGGCGGTCTGCCACACCAGACGCCTCCAGATGCAGACCA.....CTCCTATT  
CCTCGTCCAGTCCAGGATGC-----CATGGCAACAT [-21]  
CG31714-m4  
GCTGCTGACGCTCCTGCTGCCGGCGGTCTGCCACACCAGACGCCTCCAGATGCAGACCA.....CTCCTATT  
CCTCGTCCAGTCCAGGATGCGGGGGTATG-----CaCCATGGCAACAT [-10,+1]  
CG31714-m5  
GCTGCTGACGCTCCTGCTGCCGGCGGTCTGCCACACCAGACGCCTCCAGATGCAGACCA.....CTCCTATT  
CCTCGTCCAGTCCAGGATGCGGGGGTATGCaTAcAGG---ATGtGCAACAT [-7,+4]

CG3277-wt  
GAAATCACAGAGCTGACCACAAATGTCACGCTCTACATGGAGAAAATACCACGCCTACAGGTGCGA  
CG3277-m1  
GAAATCACAGAGCTGACCACAAATGTCACGCTCTACATGGAGAAAATACCACG-----TGCGA [-8]

CG34380-wt  
ACCACGCCACAGCAGCCGCTCCCCGCCCTCCATGCCGCGCCCCCGCTGGACGCTGTGCCTCTGGACG  
CTGGTGATCGCCAGCGGCTGTTTAATGCTCAACGCACCGACGACGATGGCA  
CG34380-m1  
ACCACGCCACAGCAGCCGCTCCCCGCCCTCCATGCCGCGCCCCCGCTGGACGCTGTGCCTCTGGACG  
CTGGTGATCGC---GGCTGTTTAATGCTCAACGTACCGACGACGATGGCA [-4]  
CG34380-m2  
ACCACGCCACAGCAGCCGCTCCCCGCCCTCCATGCCGCGCCCCCGCTGGACGCTGTGCC-----  
-AGCGGCTGTTTAATGCTCAACGTACCGACGACGATGGCA [-20]

CG3544-wt  
TGGACATGCTGATGGACTGTTTAGTGAAACAGGGAGCGGATATGCACACGGTGGTCTCTATTGCCGGAGCT  
GCTCAGCAGCAGGTTGCGTC.....CGGACGTGCAGGTCCGTGAAATGGAGCACACCGTCG  
CG3544-m1

TGGACATGCTGATGGACTGTTTAGTGAAACAGGGAGCGGATATGC---CGGTGGTCTCTATTGCCGGAGCTG  
CTCAGCAGCACGGTTGCGTC.....CGGACGTGCAGGTCCGTGAAATGGAGCACACCGTCTCG [-3]

CG3544-m2

TGGACATGCTGATGGACTGTTTAGTGAAACAGGGAGCGGATATGCACAaCGGTGGTCTCTATTGCCGGAGC  
TGCTCAGCAGCACGGTTGCGTC.....CGGACGTGCAGGTCCGTGAAATGGAGCACACCGTCTCG [+1]

CG3544-m3

TGGACATGCTGATGGACTGTTTAGTGAAACAGGGAGCGGATAT-----  
--GCAGTCCGTGAAATGGAGCACACCGTCTCG [-177]

CG3544-m4

TGGACAT---AT---C-----C-GG-----CACGGTGGTCTCTATTGCCGGAGCTGCTCAGCAGCACGGTTG  
CGTC.....CGGACGTGCAGGTCCGTGAAATGGAGCACACCGTCTCG [-33]

CG3544-m5

TGGACATGCTGATGGACTGTTTAGTGAAACAGGGAGCGGATATGCACAICtaTGGTCTCTATTGCCGGAGCTG  
CTCAGCAGCACGGTTGCGTC.....CGGACGTGCAGGTCCGTGAAATGGAGCACACCGTCTCG [+3,-2]

CG4629-wt

CGACGACGACGCCCTGACAATTTGTCAGCCGCCACCGCCACTCCGCCCTACCAGCGGCTCACCAAGGC  
GCTGCAATGCGATCCGCGCTGCGGCCACGAGGTGAGTGCAAATTGAA

CG4629-m1

CGACGACGACGCCCTGACAATTTGTCAGCCGtgggAGCCCcccACTCCGCCCTACCAGCGGCTCACCAAGG  
CGCTGCAATGCGATCCGCGCTGCGGCCACGAGGTGAGTGCAAATTGAA [+7,-4]

CG4629-m2

CGACGACGACGCCCTGACAATTTGTCAGCCGCCACC---ACTCCGCCCTACCAGCGGCTCACCAAG--GCT  
GCAATGCGATCCGCGCTGCGGCCACGAGGTGAGTGCAAATTGAA [-6]

CG4629-m3

CGACGACGACGCCCTGACAATTTGTCAGCCGtgggAGCCCcccACTCCGCCCTACCAGCGGCTCACCAAG-G  
GCTGCAATGCGATCCGCGCTGCGGCCACGAGGTGAGTGCAAATTGAA [+7,-5]

CG4629-m4

CGACGACGACGCCCTGACAATTTGTCAGCCGCCAC-----TCCGCCCTACCAGCGGCTCACCAAGGGC-TG  
CAATGCGATCCGCGCTGCGGCCACGAGGTGAGTGCAAATTGAA [-8]

CG4839-wt

GCCGAAAATGGCAGCGCAAACAATGGCGTCCAGGAGCGGAAGTTCCGCACCAA.....AGCGGGTGCAGCCG  
GGTGC

CG4839-m1

GCCGAAAA-----CAATGGCGTCCAGGAGAGGAAGTTCCGCACCAA.....AGCGGGTgcgctgCAGCCGGG  
TGC [-12,+6]

CG4839-m2

GCCGAAAATGGCA-----TCCAGGAGAGGAAGTTCCGCACCAA.....AGCGGGTgcgctgCAGCCGGGTG  
C [-15,+6]

CG5790-wt

AAAGTCGGCGACCAACATGGATTGTGCTAATACGAATTTAGAATCGGCAGGGAAGA.....CCGGAACATATGC  
CTTCCGTTTCGGGCACTAACCATCATTCTAGGCATCAACAGCTCCTTC

CG5790-m1

AAAGTCGGCGAC---CATGGATTGTGCTAATACGAATTTAGAATCGGCAGGGAAGA.....CCGGAACATATGCCT  
TCCGTTTCGGGCACTAACCATCATTCTAGGCATCAACAGCTCCTTC [-3]

CG5790-m2

AAAGTCGGCGACtAtCtGACATGGATTGTGCTAATACGAATTTAGAATCGGCAGGGAAGA.....CCGGAACATATG  
CCTTCCG-----GCACTAACCATCATTCTAGGCATCAACAACCTCCTTC [+4,-6]

CG5790-m3

AAAGTCGGCGACtttAgCACATGGATTGTGCTAATACGAATTTAGAATCGGCAGGGAAGA.....CCGGAACATATG  
CCTTCCG-----GGCACTAACCATCATTCTAGGCATCAACAACCTCCTTC [+4,-5]

CG5790-m4

AAAGTCGGCGACttAgCATGGATTGTGCTAATACGAATTTAGAATCGGCAGGGAAGAGTT.....GAACTATGCC  
T-----aGGC-----ATAGACTAGGCATCAACAACCTCCTTC [+4,-19]

CG5790-m5

AAAGTCGGC---tAAtAcGGAcTGTGCTAATACGAATTTAGAATCGGCAGGGAAGA.....CCGGAACATATGCCTTC  
CGTTTCGGGCACTAACCATCATTCTAGGCATCAACAGCTCCTTC [-7,+4]

CG7094-wt

GCCCATGGGTCCGGTCTCTCGGCGATATATATCTCGGACTAAGCATCACGGATGGATCCGAGGTGGCCA  
TTAAGGTGGAAGAACGATGCCAAGTACCCGCAGCTGATATACGAGGC

CG7094-m1

GCCCATGGGTCCGGTCTCTCGGCGATATATATCTCGGACTAAGCATCACGGATGGATCCGAGGcaaGCAT  
-----GCCAAGTACCCGCAGCTGATATACGAGGC [-22,+3]

CG7094-m2

GCCCATTGGGTCCGGGTCCTTCGGC--T-----CTC--(CT-----TC-----T-CC-----TTAAGGTGGAGAAGAACG  
ATGCCAAGTACCCGCAGCTGATATACGAGGC [-35,+1]

CG7094-m3

GCCCATTGGGTCCGGGTCCTTCGGCGATATATATCTCGGACTAAGCATCACGGATGGATCCGA-----CATTAA  
GGTGGAGAAGAACGATGCCAAGTACCCGCAGCTGATATACGAGGC [-6]

CG7094-m4

GCCCATTGGGTCCGGGTCCTTCGGCGATATATATCTCGGACTAAGCATCACGGATGGATCCGAGGTG-----  
GTGGCGAAGAACGATGCCAAGTACCCGCAGCTGATATACGAGGC [-9]

CG7094-m5

GCCCATTGGGTCCGGGTCCTTCGGCGATATATATCTCGGACTAAGCATCACGGATGGATCCGAGGTG-----  
--GAGAAGAACGATGCCAAGTACCCGCAGCTGATATACGAGGC [-12]

CG7094-m6

GCCCATTGGGTCCGGGTCCTTCGGCGATATATATCTCGGACTAAGCATCACGGATGGATCC-A-----CC-TTAA  
GGTGGAGAAGAACGATGCCAAGTACCCGCAGCTGATATACGAGGC [-7]

CG7236-wt

TCAGTCGGCTGGGCGAGGGCTCCTACGGTGTGGTCTACAAGTGCCGGGATCGGGAAACGG

CG7236-m1

TCAGTCGGCTGGGCGA---CT---GG---G-CTACA<sub>g</sub>GTGCCGGGATCGGGAAACGG [-13]

CG7236-m2

TCAGTCGGCTGG-----GTGTGGTCTACAAGTGCCGGGATCGGGAAACGG [-15]

CG7236-m3

TCAGTCGGCTGGGCGAGGGCTC---GGTGTGGTCTACAAGTGCCGGGATCGGGAAACGG [-4]

CG9222-wt

GTGGTACCCTTTTTAATGGCGACATCTCCAGAAGAAAAAACGATCAAGGCGGAGG.....ACTCGGGTCGTC  
GTCAGGAGCAGAAGGTCTACACCTTCAGTGACCGGCCACCACAACCAAAGCCACCGGCACCATCCGGA

CG9222-m1

GTGGTACCCTTTTTAATGGCGACATCTCCAGAAGAAAAAACGATCA-GGCGGAGG.....ACTCGGGTCGTCG  
TCAGGAGCAGAAGGTCTACACCTTCAGTGACCGGCCACCACAACCAAAGCCACCGGCACCATCCGGA [-1]

CG9222-m2

GTGGTACCCTTTTTAATGGCGACATCTCCAGAAGAAAAAACGATCAAGGCGGAGG.....ACTCGGGTCGTC-  
-----TACACCTTCAGTGACCGGCCACCACAACCAAAGCCACCGGCACCATCCGGA [-17]

CG9541-wt

TTTGTTTTAGGCGGCCCGGTAGTGGAAGGTCACCCATTGCGATACCTTCATGCAGGAG

CG9541-m1

TTTGTTTTAG-----TGGCAAGGTCACCCATTGCGATACCTTCATGCAGGAG [-13]

CG9541-m2

TTTGTTTTAGGCGGCCCGGT-GTGGCAAGGTCACCCATTGCGATACCTTCATGCAGGAG [-1]

CG10376-wt

GGTGGTCAGCCGGAGTTGTGTAACCTCGTACGGCCAATGAGACATACAAAGTGTCGGGCGAGGAGCGTCAT  
GCCGAATTGGTCTCAGCTATTTG

CG10376-m1

GGTGGTCAGCCGGAGTTGTGTAACCTCGTACGGCCAAtGtAtgtacgGACATACAAAGTGTCGGGCGAGGAGCGT  
CATGCCGAATTGGTCTCAGCTATTTG [+7]

CG10376-m2

GGTGGTCAGCCGGAGTTGTGTAACCTCGTACGGCCAItGGcGgTACATACAAAGTGTCGGGCGAGGAGCGTCA  
TGCCGAATTGGTCTCAGCTATTTG [+3]

CG10376-m3

GGTGGTCAGCCGGAGTTGTGTAACCTCGTACGGCCA-----GGAGCGTCATGCCGAATTGGTCTC  
AGCTATTTG [-25]

CG10376-m4

GGTGGTCAGCCGGAGTTGTGTAACCTCGTACGGC-----CATACAAAGTGTCGGGCGAGGAGCGTCATGCCG  
AATTGGTCTCAGCTATTTG [-8]

CG15385-wt

TCGCCAAGTACAGAGAACGCTGTGCTCCGTTGGCTCAGCTGCAGCGTTTGGATGATGGCGGCATCTTGGAG  
GGTTGGAAGCTTCAGGGCGTGCTCCTGGTCATCAGGCACGGGGATCGGG

CG15385-m1

TCGCCAAGTACAGAGAACGCTGTGCTCCGTTGGCTCAGCTGCAGCGTTTGGAG-----GGTTGGAAG  
CTTCAGGGCGTGCTCCTGGTCATCAGGCACGGGGATCGGG [-18]

CG15385-m2

TCGCCAAGTACAGAGAACGCTGTGCTCCGTTGGCTCAGCTGCAGCGTTTGGATGATGGCGG----TTGGAGG  
GTTGGAAGCTTCAGGGCGTGCTCCTGGTCATCAGGCACGGGGATCGGG [-4]



CG15385-m3  
TCGCCAAGTACAGAGAACGCTGTGCTCCGTTGGCTCAGCTGCAGCGTTTGGATGATGGCG-----GGTTG  
GAAGCTTCAGGGCGTGCTCCTGGTCATCAGGCACGGGGATCGGG [-11]

CG16771-wt  
GTTTCGAAAACCTCAGCGATGTGGACATGACGGAAGTGCAGCTGAACAATTTGGATGACTC  
CG16771-m1  
GTTTCGAAAACCTCAGCGATGTGGACATGACGGAAGTGCAGCTG---AATTTGGATGACTC [-3]  
CG16771-m2  
GTTTCGAAAACCTCAGCGATGTGGACATGACGGAAGTGCAGCTGA--AATTTGGATGACTC [-2]

CG17124-wt  
AACGAGAAAGGGGGCGGAGGTGAAGGAGCGGCGGGAGAAGTTCTCAGGCCAAGTACGGT  
CG17124-m1  
AACG-G-----T-ACG----GTACGGT [-44]  
CG17124-m2  
AACGAG--GGGGCGGAGGTGAAGGAGCGGCGGGAGAAGTTCTCAGGCCAAGTACGGT [-2]  
CG17124-m3  
AACG-----GT [-54]  
CG17124-m4  
AACGA--GGGGCGGAGGTGAAGGAGCGGCGGGAGAAGTT-----G----GTACGGT [-14]  
CG17124-m5  
AACGAGgtGGGG-CGGAGGTGAAGGAGCGGCGGGAGAAGTTCTCAGGCCAAGTACGGT [-3,+2]

CG5171-wt  
ACCTGTAATTAGTAATCTCGAGGATTTTGCGAATAATTTACCTGGGTAAGTCGGAGTTAT.....AGCGAAGACC  
AAAATGCCCGTGGAAGTGGAGGCCATACTGCACAAGATAGCCAAGCATCCCAAAGT  
CG5171-m1  
ACCTGTAATTAGTAATCTCGAGGATTTTGCGAATAATTTACCTGGGTAAGTCGGAGTTAT.....AGCGAAGACC  
AAAATGCCCGTGGAAGTGGAGGCCATACTGCACAAGATAGCCAAGCA-CCCAAAGT [-1]  
CG5171-m2  
ACCTGTAATTAGTAATCTCGAGGATTTTGCGAATAA-----GTCGGAGTTAT.....AGCGAAGACCAAATG  
CCCGTGAAGTGGAGGCCATACTGCACAAGATAGCCAAGCATCCCAAAGT [-13]  
CG5171-m3  
ACCTGTAATTAGTAATCTCGAGGATTTTGCGAATAATTTACCTGGGTAAGTCGGAGTTAT.....AGCGAAGACC  
AAAATGCCCGTGGAAGTGGAGGCCATACTGCACAAGATAGCC-----CAAAGT [-8]  
CG5171-m4  
ACCTGTAATTAGTAATCTCGAGGATTTTGCGAATAATTTACCTGGGTAAGTCGGAGTTAT.....AGCGAAGACC  
AAAATGCCCGTGGAAGTGGAGGCCATACTGCACAAGATAGCCAAGCAaTCCCAAAGT [+1]

CG5177-wt  
AGAAGGCACCATGCTGAAGAAGGAGGAGGACTACGTGAAGGCCCTCGAGGGGTGAGTTT.....GCTCACC  
GAGGAGCTGTCCGTCATGCCCAAGGATACCGAGATCAACATCAAGAACTGGC  
CG5177-m1  
AGAAGGCACCA-----AGGATACCGAGATCAACATC  
AAGAACTGGC [-198]

CG6380-wt  
CACATGATCATCGACGAACCAAAGACACCCTTCGTCTTTGAGGAGGATTTGCCAAAGGAGTTGGATACAAAT  
GCCCTGATCGAAAAGTTGAGACACACATCAAAGTCAGAAATGCCGGCA  
CG6380-m1  
CACATGATCATCGACGAACCAAAGACACCCTTCG-----GATACAAATGCCCTGATCGAAAAG  
TTGAGACACACATCAAAGTCAGAAATGCCGGCA [-29]  
CG6380-m2  
CACATGATCATCGACGAACCAAAGACACCCTTCGTCTTTGAAGAGGATTTGCCAAAG---TTGGATACAAATGC  
CCTGATCGAAAAGTTGAGACACACATCAAAGTCAGAAATGCCGGCA [-3]  
CG6380-m3  
CACATGATCATCGACGAACCAAAGACACCCTTCGTCTTTGAAGAGGATTTGCCAAAGGAtacaaaGTTGGATAC  
AAATGCCCTGATCGAAAAGTTGAGACACACATCAAAGTCAGAAATGCCGGCA [+6]

CG7115-wt  
CTCTATTTGCAAGCGGTAGATGTGTGGAGTCGCAGCATCCTGGGACGCATCCAGGCAACCCTCGGTCCGCA  
GAAG  
CG7115-m1  
CTCTATTTGCAAGCGGTAGATGTGTGGAGTCGCAGCATCCTGGGACGCATCC-----TgGGTCCGCAAG  
[-10,+1]  
CG7115-m2

CTCTATTTGCAAGCGGTAGATGTGTGGAGTCGCAGCATCCTGttttaGaGctAgaatatagCaagttaaaataagGCtAgTC  
CgttAtcaacttgaaaaagtGGCACCGaGTCGCCAGAAG [+45]

CG7115-m3

CTCTATTTGCAAGCGGTAGATGTGTGGAGTCGCAGCATCCTGGG-----CCTCGGTCGCCAGAAG [-15]

CG7115-m4

CTCTATTTGCAAGCGGTAGATGTGTGGAGTCGCAGCA-----GA--A--GG--CCTCGGTCGCCAGAAG [-17]

CG7180-wt

GCAGAGGAAAAGCCGAGCCATCGTCTCCATACCGAACACCATCAAAGTGAAGTATGCTCAA

CG7180-m1

GCAGAGGAAAAGCCGAGCCATC-----CATACCGAACACCATCAAAGTGAAGTATGCTCAA [-5]

CG10082-wt TTTCTTGGGGGATTGGGGCATGGGAGATTCTGACTTGTGTCATATCAGCAACATGTTC  
CAAATATACAACAGCCGCGAC.....CCACAGCAGCAGCAGCAGCAGCAGC.....GTTGCAGTTCGCCAGTGG  
TCCAGCTTCTGCAACAAGGCTCAT

CG10082-m1

TTTCTTGGGGGATTGGGGCATGGGAGATTCTGACTTGTGTCATATCAGCAACATGTTCCAAATATACAACA  
GCCGCGAC.....CCACAGCAGCAG-----CAGCAaC.....GTTGCAGTTCGCCAGTGGATCCAGCTTCTGCAAC  
AAGGCTCAT [-7,+1]

CG10082-m2

TTTCTTGGGG-----G-----  
-----ACAAGGCTCAT [-244]

CG10082-m3

TTTCTTGGGG-----CACCGACTCGGTGCCACTTTTTCAAGTTGATAACGGACTAGCCTTATTTAACTTGCTAT  
TTCTAGCTCTAAAACAATCCCCAAGAAATATACCTATAGTGGTTCGTATTAAGG-----CTCGGACAAGGCT  
CAT [-125]

CG10082-m4

T-----AACAAAG-----  
-----CTCAT [-253]

CG10459-wt

TGTGGTCGGTATCCTTAAGCCACGATGCCAAGATCCTGGCCAGTGGCGGTGCAGACTGCA

CG10459-m1

TGTGGTCGGTATCC-----GATGCCAAGATCCTGGCCAGTGGCGGTGCAGACTGCA [-9]

CG10459-m2

TGTGGTCGGTATCC-----TGCCAAGATCCTGGCCAGTGGCGGTGCAGACTGCA [-11]

CG1344-wt

ACTAAAAGGAATACTTGTGAGGAAAATGCGGTGGAGACTAATCAATTTGGACAGT.....TCAGACCTCTAG  
ATGAGGTGCTGGCCCAGCAGACTGACATTGAAGTCTGCCTAGG

CG1344-m1

ACTAAAAGGAATACTTGTGAG-----  
-----ACTGACATTGAAGTC  
TGCCTAGG [-340]

CG1344-m2

ACTAAAAGGAATACTTGTGAGGAAAATGCGGTGGAGACTAATCAATTTGGACAGT.....TCAGACCTCT-----  
-----GACATTGAAGTCTGCCTAGG [-25]

CG1344-m3

ACTAAAAGGAATACTTGTGAGGAATAcTTGCGGTGGAGACTAATCAATTTGGACAGT.....TCAGACCTCTA  
GATGAGGTGCTGGCCCAGCAGACTGACATTGAAGTCTGCCTAGG [+2]

CG17528-wt

AGGCTTCTATTATCGAAAAGACGAATCAACCACATAATGTTTCAGGAAGATAATAACTACA

CG17528-m1

AGGCTTCTATTATCGAAAAGACGAATCAACCACATAAaT-----AGATAATAACTACA [-8,+2]

CG3216-wt

GGGCTCCTGGACTGGCTGCGGACATGTACTTCCAGGACGACGTAATCGCGTTTATTGGAC

CG3216-m1

GGGCTCCTG-----CGGACATGTACTTCCAGGACGACGTAATCGCGTTTATTGGAC [-9]

CG3216-m2

GGGCTCCTG-----GCTGCGGACATGTACTTCCAGGACGACGTAATCGCGTTTATTGGAC [-5]

CG33671-wt

GCTGGAGGACAGCCAGGTGGCAAGTTTTCAACTGGAGGCCCTTAAGTGCACACT

CG33671-m1

GCTGGAGGACAGCCAGGTGGCAAG-----GCCCTTAAGTGCACACT [-13]

CG33671-m2  
GCTGGAGGACAGCCAGGTGGCAAGTTTcCacCTGGAGGtgagGCCCTTAACTGCACACT [+7,-1]

CG3494-wt  
GTGACGGATTGAACAGCCCCAGGCTGCAGGGAGGAAAGGAAGCGGAAGCGGATGGGAGTC.....CTCAAAT  
CAGCGAGGTGCCCATGGAGGTATTCGAGGCAGCTCAGCAGGAGCTAGTGAA

CG3494-m1  
GTGACGGATTGAACAGCCCTAGGCTGCAGGGAGGAAAGGAAGCGGAAGCAGATGGGAGTC.....CTCagAT  
CA--AG--GcC---AG--A--TCGAGGCAGCTCAGCAGGAGCTAGTGAA [-14,+2]

CG3499-m2  
GTGACGGATTGAACAGCCCCAGGCTGCAGGGAGGAAAG----GAAGCGGATGGGAGTC.....CTCAAATCAG  
CGAGGTGCCCATGGAGGTATTCGAGGCAGCTCAGCAGGAGCTAGTGAA [-6]

CG3494-m3  
GTGACGGATTGAACAGCCCCAGGCTGCAGGGAGGAAAG----GAAGCGGATGGGAGTC.....CTCAGATCAG  
CGAGGTGCCCATGGAGGTAgcTTCGAGGCAGCTCAGCAGGAGCTAGTGAA [-6,+2]

CG3608-wt  
TTTGTGCAGACCATGAAGGTACTTCACTCCGATGCGCCGAAAACCCATTGAGGACCTG

CG3608-m1  
TTTGTGCAGAC----AAc--ACTTCACTCCGATGCGCCGAAAACCCATTGAGGACCTG [-7,+1]

CG3608-m2  
TTTGTGCAGA-----AGGTACTTCACTCCGATGCGCCGAAAACCCATTGAGGACCTG [-6]

CG4945-wt  
CTACTGGTGGAGCATCGGGGATCACAGACGGAGATGGTCCTGAAAGCTGTACCCAAACCA.....CAGGAGTA  
TGCTCCACTAGGTGGGTAACCTCTATAATAACAATATTTATATATCTATATA

CG4945-m1  
CTACTGGTGGAGCATCGGG-----GATGGTCCTGAAAGCTGTACCCAAACCA.....CAGGAGTATGCTCCA  
CTAGGTGGGTA--TCCTATACTAACAATATTTATATATCTATATA [-15]

CG4945-m2  
CTACTGGTGGAGCATCGGGGATCACAGACGGAGATGGTCCTGAAAGCTGTACCCAAACCA.....CAGGAGTA  
TGCTCCACTAGGTGGG--ACTCCTATAATAACAATATTTATATATCTATATA [-2]

CG4945-m3  
CTACTGGTGGAGCATCGGG-----ACGGGAGATGGTCCTGAAAGCTGTACCCAAACCA.....CAGGAGTATGC  
TCCACTAGGTGGGTA--TCCTATACTAACAATATTTATATATCTATATA [-9]

CG5757-wt  
GCGCGGGAAAACGTGGAGCGTTGATAATATTTGAAGGATGTGATCGAAGTGGAAAGACCA

CG5757-m1  
GCGCGGGAAAACGTGGAGCGTTGATAATATTgTGAAGGATGTGATCGAAGTGGAAAGACCA [+1]

CG8179-wt  
ATCGGGAAAGGATGGCCGGCGCAAGGTCACGGAGTGCGGATCAGTGCGACGGAGCAGTGG

CG8179-m1  
ATCGGGAAAGGAT-----CGCAAGGTCACGGAGTGCGGATCAGTGCGACGGAGCGGTGG [-6]

CG8726-wt  
TATGCTCTGCCTGCGCAACGACACTACGTGGTCGCTGGGTGGAAGTATGGGTGCCATAGGTATGCT

CG8726-m1  
TATGCTCTGCCTGCGCAACGACACTACGTGGTCGCTGGGTGGAAGTATGGGTGCCA--GGTATGCT [-2]

CG8726-m2  
TATGCTCTGCCTGCGCAACGACACTACGTGGTCGCTGGGTGGAAGTATGGGTGCCAT-GGTATGCT [-1]

CG8878-wt  
ACGCAAGCGAAAGCGTTCTGCGGTCAAGGCCGCCGAGAAGCGCCAGCGCTTGAGTGGTGGTTCCAGCAGC  
GCCAATGGCTTC

CG8878-m1  
ACGCAAGCGAAAGCGTTCTGCGGTCAAGGCCGCCGAGAAGCGCCAGCG-----CGCCAATGGCTT  
C [-20]

CG8878-m2  
ACGCAAGCGAAAGCGTTCTGCG-----GTGGTTCCAGCAGCGCCAATGGCTTC [-34]

CG8878-m3  
ACGCAAGCGA-----TG-G-----CC-----TG-Ga--TGTTCCAGCAGCGCCAATGGCTTC [-39,+1]

CG8878-m4  
ACGCAAGCGAAAGCGTTCTGCGGTCAAGGCCGCCGAGAAGCGCCAGC-C-----GTGGTTCCAGCAGCGCCA  
ATGGCTTC [-8]

CG10417-wt  
TAGCCGTTGGAGCTAGCTCTATGCAAGGATGGCGGAACAGCCAAGAGGTAAATTGAGATG  
CG10417-m1  
TAGCCGTTGGAGCTAGCTCTAT---AGGATGGCGGAACAGCCAAGAGGTAAATTGAGATG [-3]  
CG10417-m2  
TAGCCGTTGGAGCTAGCTCTAT----GGATGGCGGAACAGCCAAGAGGTAAATTGAGATG [-4]  
CG10417-m3  
TAGCCGTTGGAGCTAGCTCTATGC----ATGGCGGAACAGCCAAGAGGTAAATTGAGATG [-4]  
CG10417-m4  
TAGCCGTTGGAGCTAGCTCTAaGC--GGATGGCGGAACAGCCAAGAGGTAAATTGAGATG [-3,+1]

CG3290-wt  
ACAGTCACAGCTGCTCGCATCCTGAAAGGACAACGCCAAGGAAACACTGGGGAGGAGTCC  
CG3290-m1  
ACAGTCACAGCTGCTCGCATCCTAAAAGGACAACGCCAA-----CACTGGGGAGGAGTCC [-5]

CG3292-wt  
TAGCCATTAGCCTGGTGTATGCACCCTGGTGGCCACCTCCTTGGCTGCTTCCATAG.....CGCGAAGGAAA  
CCTTATCGACCCAAATGCCATGGCCAAGGGAAAACCCGGACCAGAGGAGGAGAAGAA  
CG3292-m1  
TAGCCATTAG-CTGGTGTATGCACCCTGGTGGCCACCTCCTTGGCTGCTTCCATAG.....CGCGAAGGAAAC  
CTTATCGACCCAAATGCCATGGCCAAGGGAAAACCCGGACCggtcctccAGAGGAGGAGAAGAA [-1,+8]  
CG3292-m2  
TAGCCATTAGCCTGGTGTATGCACCCTGGTGGCCACCTCCTTGGCTGCTTCCATAG.....CGCGAAGGAAA  
CCTTATCGACCCAAATGCCATGGCCAAGGGAAAACCCGGACC-GAGGAGGAGAAGAA [-1]  
CG3292-m3  
TAGCCA-----AGAAGAA [-2  
32]  
CG3292-m4  
TAGCCATTAGCCTGGTGTATGCACCCTGGTGGCCACCTCCTTGGCTGCTTCCATAG.....CGCGAAGGAAA  
CCTTATCGACCCAAATGCCATGGCCAAGGGAAAACCCGt--CC--GGAGGAGAAGAA [-5,+1]

CG3530-wt  
AGCTTCCCTTGAGCACGACAGGATCTCCGCTACTCATCCGCTGCAAGACCTTCTCTCCG.....AAGGATGAT  
TTCCCAAGAACGCTGGCTGGGATTACTTTAAACTGGAGGCGGAGTTCAAG  
CG3530-m1  
AG-----CACGACAGGATCTCCGCTACTCATCCGCTGCAAGACCTTCTCTCCG.....AAGGATGATTTCC  
CAAGAACGCTGGCTGGGATTACTTTAAACTGGAGGCGGAGTTCAAG [-11]  
CG3530-m2  
AGCTTCCCTTGAGCACGACAGGATCTCCGCTACTCATCCGCTGCAAGACCTTCTCTCCG.....AAGGATGAT  
TTCCCAAGAACGCTGGCTGGGATTACTTTAAACTG---GCGGAGTTCAAG [-3]

CG6805-wt  
TGGCACCACCACTTGTCCGGATAACCAGCTGCCCGATATCTATGTAATCGGATTCCAGGAGGTGAGCACCA  
CACCGCAGGTGCTAAAAATCTTCAATGACGATCCGTGGGTGCTGAAGAT  
CG6805-m1  
TGGCACCACCACTTGTCCGGATAACCAGCTGCCCGATATCTATGTAATCGGATTCCAGGAGGTGAGCACC---  
--GCAGGTGCTAAAAATCTTCAATGACGATCCGTGGGTGCTGAAGAT [-5]  
CG6805-m2  
TGGCACCACCACTTGTCCGGATAACCAGCTGCCCGATATCTATGTAATCGGATTCCAGGAGGTGAGCACCC-  
---GCAGGTGCTAAAAATCTTCAATGACGATCCGTGGGTGCTGAAGAT [-4]  
CG6805-m3  
TGGCACCACCACTTGTCCGGATAACCAGCTGCCCGATATCTATGTAATCG-----GAGGT-----GCAGGTG  
CTAAAAATCTTCAATGACGATCCGTGGGTGCTGAAGAT [-20]

CG12484-wt  
CACACGCTGGGTCTTACAACGAGGGCTCTGGGATAAACATCACGTGCGTGCCATCGGC  
CG12484-m1  
CACACGCTGGGTCTTACAACGAGGGCTCTGGGATAAACAT---TGCCTGGCCATCGGC [-4]  
CG12484-m2  
CACACGCTGGGTCTTACAACGAGGGCTCTGGGATAAACATCA--TGCCTGGCCATCGGC [-2]  
CG12484-m3  
CACACGCTGGGTCTTACAACGAGGGCTCTGGGATAAACATCAiG-GCCTGGCCATCGGC [-2,+1]  
CG12484-m4  
CACACGCTGGGTCTTACAACGAGGGCTCTGGGATAAACATCAC-TGCCTGGCCATCGGC [-1]

CG33672-wt  
CGAATCAGACGGCTGTGGCGGCAAGTTCAGCGCCGTAATCGTATCGCCAGCCTTCAGCGGCAAGACCCTTC  
TCCAGAAGCATAGATTAGTTAACTCAACGCTTGCCGAAGAAGTCAAAGA

CG33672-m1  
CGAATCAGACGGCTGTGGCGGCAAGTTCAGCGCCGTAATCGTATCGCCAGCCTTCA--GGCAAGACCCTTCT  
CCAGAAGCATAGATTAGTTAACTCAACGCTTGCCGAAGAAGTCAAAGA [-2]

CG33672-m2  
CGAATCAGACGGCTGTGGCGGCAAGTTCAGCGCCGTAATCGTATCGCCAGCCTTCAG-GGCAAGACCCTTC  
TCCAGAAGCATAGATTAGTTAACTCAACGCTTGCCGAAGAAGTCAAAGA [-1]

CG34318-wt  
CTGCAGGAGGTGCGAAACCGATTACAGGCCTGCAACGACGTGGCCAGCGTCCTT

CG34318-m1  
CTGCAGGAGGTGCGAAAC-----ACAGGCCTGCAACGACGTGGCCAGCGTCCTT [-6]

CG34318-m2  
CTGCAGGAGGTGCGAAACCGAaaCggaACAGGCCTGCAACGACGTGGCCAGCGTCCTT [+6,-2]

CG34318-m3  
CTGCAGGAGGTGCGAAACCG-TTg-CAGGCCTGCAACGACGTGGCCAGCGTCCTT [-3,+1]

CG10738-wt  
GACGACTCAGGGATCGGGGTCATTCCCTTCAGTTCGTCGTGGCCGAAACTTACG

CG10738-m1  
GACGA-TCAGGGATCGGGGTCATTCCCTTCAGTTCGTCGTGGCCGAAACTTACG [-1]

CG10738-m2  
GACGAiCcccgATCAGGGATCGGGGTCATTCCCTTCAGTTCGTCGTGGCCGAAACTTACG [+6]

CG11811-wt  
GGGCGCTCAGCAGCAGCAGCAGTAGCAGTGCAGCGGCATCCTTAACGAGCA

CG11811-m1  
GGGCGCTCAGCAGCAGCAGCAGCAGcggcagTAGCAGTGCAGCGGCATCCTTAACGAGCA [+6]

CG12229-wt  
CTACGTCTGACAACTGGCTTGCTCTGGAGATTAACGGCGAGTGCTGTTCGCGTTGGGAGA

CG12229-m1  
CTACGTCT-----GGCTTGCTCTGGAGATTAACGGCGAGTGCTGTTCGCGTTGGGAGA [-7]

CG12229-m2  
CTACGTCT----ACTGGCTTGCTCTGGAGATTAACGGCGAGTGCTGTTCGCGTTGGGAGA [-4]

CG12229-m3  
CTACGTCTG-gAACTGGCTTGCTCTGGAGATTAACGGCGAGTGCTGTTCGCGTTGGGAGA [-2,+1]

CG12289-wt  
GACTACGTGACCACCATGGATAAGTTCGACTTCCAGTGCAGCAGGTGCAGCACCCAGAAT

CG12289-m1  
GACTACGT-----GACAGGTGCAGCACCCAGAAT [-31]

CG1271-wt  
ATGCGAAGTCCGGGATCGGCGGTGGATGCTGTAAGTGATTCGATCTTCAAGT

CG1271-m1  
ATcGGtccAAatccGaTcTGGGGATCGGCGGTGGATGCTGTAAGTGATTCGATCTTCAAGT [+7]

CG34455-wt  
GTTTCGATGTGGATCCACTGAACTCGGTCCAGTCTCCAATCATACGGGCTACAAGACCT

CG34455-m1  
GTTTCGATGTGGATCCACTG-----GGTCCAGTCTCCAATCATACGGGCTACAAGACCT [-5]

CG7328-wt  
CGTGACCATCAATGGGAGCTATCCTATGGAGGACACCGATCGGCGATGCCTGGATGGGTT

CG7328-m1  
CGTGACCATCAATGGGAGCTATCCTATGGAGGACACC-----TGGATGGGTT [-13]

CG7328-m2  
CGTGACCATCAATGGGAGCTATCCTATGGAGGACACCGATCGGC--TGCCTGGATGGGTT [-2]

CG7551-wt  
ATACTGGATTTCGCGGTGGCAAGGCCTCGAACAAGTACTGTTTTGGCCAATCTGGGCGT.....CTTGAAGA  
GTCGTGGCATCATTATCGACAAGTCCAACCTGTGACCAGGGTGCACCCTT

CG7551-m1

ATACTGGAT---CGGTGGCAAGGCCTCGAACAACTGTACTGTTTTGGCCAATCTGGGCGT.....CTTGAAGAGT  
CGTGGCATCATTATCGACAACCTGTCCAACCTGTGACCAGGGTGCACCCTT [-3]

CG7551-m2

ATACTGGATTTCGGGTGGCAAGGCCTCGAACAACTGTACTGTTTTGGCCAATCTGGGCGT.....CTTGAAGA  
GTCGGGCATCATTATCGACAACCTGTCCAACC---ACCAGGGTGCACCCTT [-4]

CG7551-m3

ATACTGGATTC-CGGTGGCAAGGCCTCGAACAACTGTACTGTTTTGGCCAATCTGGGCGT.....CTTGAAGAG  
TCGTGGCATCATTATCGACAACCTGTCCAACCTGTGACCAGGGTGCACCCTT [-1]

CG7616-wt

ATGGCCTGCGAGAGGCGAATGTCCAGAAAGGCGGTCGTCCTGTATTGCGATTTAGTCTTT

CG7616-m1

ATGGCCTGCGAGAGGCGAATGTCCA---AGGCGGTCGTCCTGTATTGCGATTTAGTCTTT [-3]

CG10089-wt

CGCGAAGGCAACGTACTCATCCACTGCCTGGCGGGGATGTGCGGCTCGGTGACCGTGGCCGTGGCCTATA  
TCATGACGGCCACACACCTGAACTGGAAGGAGGCACTTAAGGTGGT

CG10089-m1

CGCGAAGGCAACGTACTCATCCACTGCCTGGCGGGGATGTGCGGCTCG-----GTGGCCGTGGCCTATATCA  
TGACGGCCACACACCTGAACTGGAAGGAGGCACTTAAGGTGGT [-6]

CG10089-m2

CGCGAAGGCAACGTACTCATCCACTGCCTGGCGGGGATGTGCGGCTCGGT---CGTGGCCTatataGGCCTATA  
TCATGACGGCCACACACCTGAACTGGAAGGAGGCACTTAAGGTGGT [-4,+5]

CG10089-m3

CGCGAAGGCAACGTACTCATCCACTGCCTGGCGGGGATGTGCGGCTCGGT-----CATGACGGCC  
ACACACCTGAACTGGAAGGAGGCACTTAAGGTGGT [-21]

CG10089-m4

CGCGAAGGCAACGTACTCATCCACTGCCTGGCGGGGATGTGCGGCTCGG---CCGTGGCCGTGGCCTATATC  
ATGACGGCCACACACCTGAACTGGAAGGAGGCACTTAAGGTGGT [-3]

CG10089-m5

CGCGAAGGCAACGTACTCATCCACTGCCTG-----GCCTATATCATGACGGCCACACACC  
TGAAGTGGAAAGGAGGCACTTAAGGTGGT [-33]

CG10426-wt

GCTGAGCAAGCGACCTAGTAAGGTGGAGCC.....GCGATGGAGGAGCCGACGTGGTGTGTCGGCGCAAGTC

CG10426-m1

GCTGAGCAAGCGACCTA---AGGTGGAGCC.....GCGATGGAGGAGCCGACGTGGTGTGTCGGCGCAAGTC [-  
3]

CG10426-m2

GCTGAGCAAGCGACCTA---AGGTGGAGCC.....GCGATGGAGGAGCCGACGatggttttagagctagaatgaagtaaa  
ataaggctagtccgtatcaactgaaaaagtggcaccgagtcggtgctagtcggtGTCGGCGCAAGTC [-3,+80]

CG10426-m3

GCTGAGCAAGCGACCT--AAGGTGGAGGCC.....GCGATGGAGGAGCCGACGTGGT----GCGCAAGTC [-7]

CG10426-m4

GCTGAGCAAGCGACCTAG-----TGGAGCC.....GCGATGGAGGAGCCGACGTG-----GCGCAAGTC [-13]

CG10592-wt

ACTTCGAGGCCCTCGACGAGGAGCTGGACACACGATTCTGGCACGATAAAGGCCAATCGATTCTGGCCGAT  
AAGCTGGCCGCCATAAAAAGCTCAACGAGAATCGCGCCAAGAACGTGA

CG10592-m1

ACTTCGAGGCCCTCGACGAG-----GCACGATAAAGGCCAATCGATTCTGGCCGATAAAGCTGGCCG  
GCCATAAAAAGCTCAACGAGAATCGCGCCAAGAACGTGA [-20]

CG10592-m2

ACTTCGAGGCCCTCGACGAGGAGCTGGACA-----CACGATAAAGGCCAATCGATTCTGGCCGATAAAGCT  
GGCCGCCATAAAAAGCTCAACGAGAATCGCGCCAAGAACGTGA [-11]

CG10592-m3

ACTTCGAGGCCCTCGACGAGGAGCTGG-----ACGATAAAGGCCAATCGATTCTGGCCGATAAAGCTGG  
CCGCCATAAAAAGCTCAACGAGAATCGCGCCAAGAACGTGA [-15]

CG10592-m4

ACTTCGAGGCCCTCGACGAGGAGCTGGACACACGA--C--AC-----  
---AAGAACGTGA [-72]

CG11425-wt

TCTGCGGCCCCCATCCGCTCCTGGTGGACCTGGTCCTGCTGGGCCTACTTATTGTCCT

CG11425-m1

TCTGCGGCCCCCATCCG---CCTGGTGGACCTGGTCCTGCTGGGCCTACTTATTGTCCT [-3]

CG11426-wt  
CGGCTCCACGGGACCGTCATCGGATCGCCGGATGACGCAGCGCCTGCTCGTGGAGCTCCT.....GCCGGTA  
ATGCTCGCCTGATCGTGGCCTGCTTCCGGCCCTGGTCATGGTGGTGGTGA

CG11426-m1  
CGGCTCCACGGGACCGTCATCGGATCGCCGGATGACGCAGCGCCTGCTCGTGGAGCTCCT.....GCCGGTA  
ATGCTCG-----GCCTGCTTCCGGCCCTGGTCATGGTGGTGGTGA [-12]

CG11426-m2  
CGGCTCCACGGGACCGTCATCGGATCGCCGGATGACGCAGCGCCTGCTCGTGGAGCTCCT.....GCCGGTA  
ATGCTCG-----TGGCCTGCTTCCGGCCCTGGTCATGGTGGTGGTGA [-9]

CG11426-m3  
CGGCTCCACGGGACCGTCATCG-----GATGACGCAGCGCCTGCTCGTGGAGCTCCT.....GCCGGTAATGC  
TCGGCCTGATCGTGGCCTGCTTCCGGCCCTGGTCATGGTGGTGGTGA [-8]

CG11437-wt  
TCTTCGACCCGCTCAATCTTCAGTGTGAAAATGTGCGGCAATCCGAACACGCGTCTCCTC.....TATCCCTAT  
CGCCAGCCCTGGCTGACCAAGGTCCACCTTACGATCGCAGTGGTTGCTCTG

CG11437-m1  
TCTTCGACCCGCTCAATCTTCAGTGTGAAAATGTGCGGCAATCCG-----CGTCTCCTC.....TATCCCTATCGC  
CAGCCCTGGCTGACCAAGGTCCACCTTACGATCGCAGTGGTTGCTCTG [-6]

CG11437-m2  
TCTTCGACCCGCTCAATCTTCAGTGTGAAAATGTGCGGCAATCCGAt--GCGTCTCCTC.....TATCCCTATCG  
CCAGCCCTGGCTGACCAAGGTCCACCTTACGATCGCAGTGGTTGCTCTG [-4,+1]

CG11437-m3  
TCTTCGACCCGCTCAATCTTCAGTGTGAAAATGTGCGGCAATCCGAACACGCGTCTCCTC.....TATCCCTAT  
CGCCAGCC---GCTGACCAAGGTCCACCTTACGATCGCAGTGGTTGCTCTG [-3]

CG11437-m4  
TCTTCGACCCGCTCAATCTTCAGTGTGAAAATGTGCGGCAATCCGAACACGCGTCTCCTC.....TATCCCTAT  
CGCCAGCCa--GCTGACCAAGGTCCACCTTACGATCGCAGTGGTTGCTCTG [-3,+1]

CG11438-wt  
GTCCAAGTATTCGAAGCTGGCCCGCGGGTTCTGCGACCTGCTGATCTGGGTGGCCCTCAGCGTGGCCAGT  
GTGCTGCTCCACAAGATGGGGCGTCCCTTCCGGCGCGGCTTCTTCTGTGG

CG11438-m1  
GTCCAAGTATTCGAAGCTGGCCCGCGGGTTCTGCGACCTGCTGATCTGGGTGGCCCTCAGCGTGGCCAGT  
G-----GGCGTCCCTTCCGGCGCGGCTTCTTCTGTGG [-18]

CG11438-m2  
GTCCAAGTATTCGAAGCTGGCCCGCGGGTTCTGCGACCTGCTGATCTGGGTGGCCCTCAGCGTGGCCAGT  
GTGCTGCTCCACAcaTGGaGCGTgaag-CCGGCGCGGCTTCTTCTGTGG [-8,+7]

CG11438-m3  
GTCCAAGTATTCGAAGCTGGCCCGCGGGTTCTGCGACCTGCT-----GTGGCCAGTGTGCTGCTCCA  
CAAGATGGGGCGTCCCTTCCGGCGCGGCTTCTTCTGTGG [-19]

CG11597-wt  
GGTCAGTTCGAGGATCTGCTCCACCTGCTGGAATTGGGCGGTTCCGGTGCAGGAGCATCGC

CG11597-m1  
GGTCAGTTCGAGGATCTGCTCCACCTGCTGGAATTGGGCGGTTCCG-TGCAGGAGCATCGC [-1]

CG17027-wt  
ACTTTCTCATGGAGAAAATATTGGCCAGATACCCGGATCACAAGTTCATCGGCGAGGAGG

CG17027-m1  
ACTTTCTCATGGAGAAAATATTGGCCAG-----ATCACAAGTTCATCGGCGAGGAGG [-8]

CG17027-m2  
ACTTTCTCATGGAGAAAATATTGG-----CCCGGATCACAAGTTCATCGGCGAGGAGG [-7]

CG17028-wt  
TGCGGTCCGCTC.....ATCATAGATCCCA

CG17028-m1  
TGCGGTCCGCTC-----ATGGGACCGGTCCGGTCATC-----ATCATAGATCCCA [-181]

CG17029-wt  
TTCTACGACCTGGTGACCGTGTACGATAAGCAAATCGAGGATATTTTGACCGAGGGATTGGTGGCCGCCTTT  
CCCGAATCCCTGATCATTGGCGAGGAGGAGTCGGCAGTTTCAC

CG17029-m1  
TTCTACGACCTGGTGACCGTGTACGATAAGCAAATCGAGGATATTTTGACCGAGG-----TGGCCGCCTTTCC  
GAATCCCTGATCATTGGCGAGGAGGAGTCGGCAGTTTCAC [-6]

CG17029-m2

TTCTACGACCTGGTGACCGTGTACGATAAGCAAATCGAGGATATTTTGACCGAGGtgccGATTGGTGGCCGC  
CTTTCCCGAATCCCTGATCATTGGCGAGGAGGAGTCCGCAGTTTCAC [+5]

CG17029-m3

TTCTACGACCTGGTGACCGTGTACGATAAGCAAATCGAGGATATTTTGACCGAGGcA-----CCGCCTTTCCCG  
AATCCCTGATCATTGGCGAGGAGGAGTCCGCAGTTTCAC [-8,+1]

CG17029-m4

TTCTACGACCTGGTGACCGTGTACGATAAGCAAATCGAGGATATTTTGACCGAGGttgactGATTGGTGGCCG  
CCTTTCCCGAATCCCTGATCATTGGCGAGGAGGAGTCCGCAGTTTC [+7]

CG17029-m5

TTCTACGACCTGGTGACCGTGTACGATAAGCAAATCGAGGATATTTTGACCGAG--ATTGGTGGCCGCCTTTC  
CCGAATCCCTGATCATTGGCGAGGAGGAGTCCGCAGTTTCAC [-2]

CG17746-wt

CAACACACTCCACACCGCACACCATAACAAGCCGCAATGGGTGACACTCTATCGGAACCGGTGA.....TGCAG  
GGGTGGCGCATCAACATGGAGGACTCGCACACCCACATCCTCTCGCTGCCGGACG

CG17746-m1

CAACACACTCCACACCGCACACCATAACAAGCCGCAATGGGTGACACTCTATCG-----GTGA.....TGCAGGGG  
TGGCGCATCAA-----CTCGCACACCCACATCCTCTCGCTGCCGGACG [-15]

CG17746-m2

CAACACACTCCACACCGCACACCATAACAAGCCGCAATGGGTGACACTCTATCGGAACCGGTGA.....TGC-----  
TGG-----ACTCGCACACCCACATCCTCTCGCTGCCGGACG [-21]

CG17746-m3

CAACACACTCCACACCGCACACCATAACAAGCCGCAATGGGTGACACTCTATCGGAACCGGTGA.....TGCAG  
GGGTGGCG-----CATGGAGGACTCGCACACCCACATCCTCTCGCTGCCGGACG [-6]

CG17746-m4

CAACACACTCCACACCGCACACCATAACAAGCCGCAATGGGTGACACTCTATCGGAACCGGTGA.....TGCAG  
GGGTGGCGCATCA-----ACTCGCACACCCACATCCTCTCGCTGCCGGACG [-9]

CG5150-wt

GAGTCTTAAGTTCTGGATTTCGCTCGGTCTGCTGACCGTCGTTTGGGGTG.....GAGGCGAGGAGTTGAAGC  
TCTCCTTCGAAGAAATCCCTTTACCGGACTATCGAAAACCT

CG5150-m1

GAGTCTTAAGTTCTGGATTTCGCTCGGTCTGCTGACCGTCGTTTGGGGTG.....GAGGCGAGGAGTTGAAGC  
TCTCCTTCGAAGAAATCCCT-----CCGGACTATCGAAAACCT [-4]

CG5150-m2

GAGTCTTAAGTTCTGGATTTCGCTCGGTCTGCTGACCGTCGTCG-----.....-----A  
CCGGACTATCGAAAACCT [-287]

CG5150-m3

GAGTCTTAAGTTCTGGATTTCGCTCGGTCTGCTGACCGTCGTTTGGGGTG.....GAGGCGAGGAGTTGAAGC  
TCTCCTTCGAAGAAATCCCTTTtccCCGGACTATCGAAAACCT [+3,-1]

CG5150-m4

GAGTCTTAAGTTCTGGATTTCGCTCGGTCTGCTGACCGTCGTTTGGGGTG.....GAGGCGAGGAGTTGAAGC  
TCTCCTTCGAA-----AACCT [-26]

CG9238-wt

AAGCCATATATAAAATGATTTTCGCACAGTCCGCCATATTCAGTCACAGTCCACCCGTTA

CG9238-m1

AAGCCATATATAAAATGATTTTCGCACAG-----TCCACCCGTTA [-21]

CG9389-wt

GGAAACGCGGCTACCCGATTTCGGCTTGGAGGATCACGAGGCCACTCAGCAGGATGCCCGGGTGAACAC  
A.....GTCATCGGAGGAATCAGAGAAACGCGTCCCACCTGCTGCTGCATCGGCGCCTCCTCCAGC

CG9389-m1

GGAAACGCGGCTACCCGATTTCG-----GCAGGATGCCCGGGTGAACACA.....GTCATCGGAGG  
AATCAGAGAAACGCGTCCCACCTGCTGCTGCATCGGCGCCTCCTCCAGC [-25]

CG9389-m2

GGAAACGCGGCTACCCGATTTCGGCTTGGAGGATCACGAGGCCACTCAGCAGGATGCCCGGGTGAACAC  
A.....GTCATCGGAGGAATCAGAGAAACGCGTCCCACCT-----GCATCGGCGCCTCCTCCAGC [-6]

CG9391-wt

ACAACGTGGACGTGGAAAAGTGCTTAGAGGTGGCCAGCAACCTGGTTTCCGAAGCCGGAA

CG9391-m1

ACAACGTGGACGTGGAAAAG-----AGGTGGCCAGCAACCTGGTTTCCGAAGCCGGAA [-7]

CG9391-m2

ACAACGTGGACGTGGAAAAG-----GTGGCCAGCAACCTGGTTTCCGAAGCCGGAA [-9]



CG9449-wt  
CACCCGACGGCATTGTCTCGCGATGACGGGCGGACTAATTGCATCGGCGGTCATAATCTG  
CG9449-m1  
CACCCGACGGCATTGTCTCGCGATGACGGGCGGACTAATT-----GCGGTCATAATCTG [-6]  
CG9449-m2  
CACCCGACGGCATTGTCTCGCGATGACGGGCGGACTAATT---CGGCGGTCATAATCTG [-4]  
CG9449-m3  
CACCCGACGGCATTGTCTCGCATTGTCGG-----CGGTCATAATCTG [-18]

CG9451-wt  
GAAGTGCCGCAGG AAGTCACGGAAGGTCTGGGGATGTCTCTCAAAGCTCAGC.....ACCTACGAGCCCTT  
CGGTTGGGGAGCAGCTACCAATGTTAGTACTTATCAAACATAAAACAAGACTATTATCGAAGCTA  
CG9451-m1  
GAAGTGCCGCAGGAAG-----TACATCACTGTTAGTACTTATC  
AAACATAAAACAAGACTATTATCGAAGCTA [-1001]  
CG9451-m2  
GAAGTGCCGCAGGAAG-----TACGTCAGTGTAGTACTTATC  
AAACATAAAACAAGACTATTATCGAAGCTA [-1001]  
CG9451-m3  
GAAGTGCCGCAGGcAAGTCACtcAAaGcTgatGtGATGTCTCTCAAAGCTCAGC.....ACCTACGAG-----C  
ACTACCAATGTTAGTACTTATCAA-CAT--AACAGACTATTATCGAAGCTA [-28,+9]

CG34140-wt  
TCTATACAGTCATATAGTAACCGTAACTTTCAGAACAGACGCCGGTGTACACGCCCTGCA  
CG34140-m1  
TCTATACAGTCATATAGTAACCGTAACTTTCAGAACA-----CGCCCTGCA [-14]

CG5946-wt  
GTGCCACTCGCCGTGGGTGTGGTAGCCGTAAGTCTCGCCGGCGCCCTGATCGTCCACTATCTGCTGAATAAGAA  
GTCCACGAAACCACGCCGGAACCCAATCGCACCGCTCGGCTGCGCACACTTGTGGATCCCAATGA  
CG5946-m1  
GTGCCACTCGCCGTGGGTGTGGTAGCCG-----GCGCCCTGATCGTCCACTATCTGCTGAATAAGAAGTCC  
ACGAAACCACGCCGGAACCCAATCG-----CTCGGCTGCGCACACTTGTGGATCCCAATGA [-14]

CG10177-wt  
TGCGGGTGTGCTTCTCGGGAACGGAGATAGACACTTCAAGGGCGTTAATTTGGTCATCT  
CG10177-m1  
TGCGGGTGTGCTTCT-----GAGATAGACACTTCCAGGGCGTTAATTTGGTCATCT [-8]  
CG10177-m2  
TGCGGGTGTGCTTCTG--GAACGGAGATAGACACTTCAAGGGCGTTAATTTGGTCATCT [-2]  
CG10177-m3  
TGCGGGTGTG-----CGGAGATAGACACTTCCAGGGCGTTAATTTGGTCATCT [-12]

CG12069-wt  
AGCAAGCGCAGATGCACTTCAGTCCCAAGGTGGACTACATTCTCATCCTGGACAAGTTGC  
CG12069-m1  
AGCAAGCGCAGATGCACTTCAGTCCCAAGGTGGACTACATTCTC---CTGGACAAGTTGC [-3]  
CG12069-m2  
AGCAAGCGCAGATGCACTTCAGTCCCAAGGTGGACTACATTCTCA-----AGTTGC [-9]

CG14305-wt  
GAAGTTCGGATGTGGATGCACTGGCACAGCGGGGCTACAATGTGGGTCACAAGATCGGCGAGGGGTCTTA  
TGCCACTGTTATAACCGCCGGTTATGCCGATGATCATGGACATGGAGTAC  
CG14305-m1  
GAAGTTCGGATGTGGATGCACTGGCACAGCGGGGCTACAATGTGGGTCACAAGATC--CGAGGGGTCTTATG  
CCACTGTTATAACCGCCGGTTATGCCGATGATCATGGACATGGAGTAC [-2]  
CG14305-m2  
GAAGTTCGGATGTGGATGCACTGGCACAGCGGGGCTACAATGTGGGTCACAAGATCG-----GGGTCTTATGC  
CACTGTTATAACCGCCGGTTATGCCGATGATCATGGACATGGAGTAC [-5]

CG1951-wt  
TGACCGGGAGACCATGCTGAAACACTGCGTCGCGGGGTTCAACAGCTAACAAAAATTTCG  
CG1951-m1  
TGACCGGGAGACC---TGAAACACTGCGTCGCGGGGTTCAACAGCTAACAAAAATTTCG [-4]  
CG1951-m2  
TGACCGGGAGACC---CTGAAACACTGCGTCGCGGGGTTCAACAGCTAACAAAAATTTCG [-3]  
CG1951-m3

TGACCGGGAGAC-----TGGAAACACTGCGTCGCGGGGTTCAACAGCTAACAAAAATTTCG [-5]

CG2246-wt  
ACTGGTGACCTTCTTCTGCTCACTAATTATATGTCTTTTACCCCCAAAAGGGATGCCAACATAATATCATGG  
AGCTTCTGATTATGGCCTACGCCTGCAAGACTTCCTCGGCTCGTTTCG

CG2246-m1  
ACTGGTGACCTCCTTCTGCTCATTAAATTATATCTCTTTTACCCCCAAAGa-GATGCCAACATAATATCATGGA  
GCTTCTGATTATGGCCTACGCCTGCAAGACTTCCTCGGCTCGTTTCG [-2,+1]

CG2246-m2  
ACTGGTGACCTCCTTCTGCTCATTAAATTATATCTCTTTTACCCCCAAAGa-GATGCCAACATA---TCATGGAG  
CTTCTGATTATGGCCTACGCCTGCAAGACTTCCTCGGCTCGTTTCG [-5,+1]

CG31431-wt  
TGTGCGGCTTTCAGCAGTCCCCTGTTTTTTTTGTTGACTATACAGGTGAGTTTAGTTCTTA  
CG31431-m1  
TGTcCctGGCTTTCAGCTGTCCCACTGTTTTTTTTGTTGACTATACAGGTGAGTTTAGTTCTTA [+3,-1]

CG3809-wt  
CTACCAGAGGGAATACTTATGGGCTTTGGCAACCCCCTGCTGGACATCACCTGCACCGTTGAGGATAATGT  
GATCCTGGA  
CG3809-m1  
CTACCAGAGGGAATACTTATGGGCTTTGGCAACCCCCTGCTGGACATCACCTGCAC--TTGAGGATAATGTGA  
TCCTGGA [-2]

CG10999-wt  
CGCACGCAACAGGAGCAGGAGGTGCGTAGGCGGGAGCTGATGAGCACGAAGTCAAGTGCC  
CG10999-m1  
CGCACGCAACAGGAGCAGGAGGTGCG-----GGAGCTGATGAGCACGAAGTCAAGTGCC [-6]  
CG10999-m2  
CGCACG-----GGAGCTGATGAGCACGAAGTCAAGTGCC [-26]

CG12538-wt  
GGTGGCTCTGGCGTGCTATTTGAATTGAACAAGTGTGACGCTCGAGGGGAAACAGCGTCAAGCTGACGCT  
CCATGGTGTCCAATAAAACTACCAAAGCCCCCTCCCGCCG.....GAAACACAAATACTAGACGGC  
CG12538-m1  
GGTG-----GTGTCGGTG-----TCCAATAAAACTACCAAAGCCCCCTC  
CCGCGG.....GAAACACAAATACTAGttagctctttggccgcgaC [-67,+16]  
CG12538-m2  
GGTGGCTCTGGCGTGCTATTTGAATTGAACAAGTGTGACGCTCGAGGGGAAACAGCGTCAAGCTGACGCT  
CCATGG-----CCCCTCCCGCCG.....GAAACACAAATACTAGttagctctttggccgcgaC [-23,+16]  
CG12538-m3  
GGTGGCTCTGGCGT-----GCTCCAATAAAACTACCAAAGCCCCCT  
CCCGCCG.....GAAACACAAATACTAGttagctctttggccgcgaC [-64,+16]  
CG12538-m4  
GGTGGCTCTGGCGTGCTATTTGAATTGAACAAGTGTGACGCTCGAGGGGAAACA-----  
-----GCCCCCTCCCGCCG.....GAAACACAAATACTAGttagctctttggccgcgaC [-44,+16]

CG12746-wt  
CGGGGAGCTGCTCTTCTGGGTGATAGTGGCTCCCTTTCTGGTCACTATCGCCTTCTACTG  
CG12746-m1  
CGGGGAGCTGCTCTTCTGGGTGA-----ACTATCGCCTTCTACTG [-20]

CG14297-wt  
CTTTGCCATTTTGCATGAAAACTTACGTCAATTCGAAGGCAACTCGTGCAGCTCTCCGATGGCCGAGGTGA  
TTATGCAGAATCTGATGGTCAAGACGAGTCTCTACTGGGAGGTGGATAGTGCCGGTCTGAGGACATGGAAC  
ACT  
CG14297-m1  
CTTTG--AT---GCAaGAAAACTTccATCATTTTGAAGGCAACTCGTGCAGCTCTCCGATGGCCGAGGTGATTAT  
GCAGAAAT--GATGGTCAAGACGAGTCTCTACTGGGAGGTGGATAGTGCCGGTCTCAGGACATGGAACtggaca  
CT [-10,+8]  
CG14297-m2  
CTTTG--AT---GgAaGAAAACTTccATCATTTTGAAGGCAACTCGTGCAGCTCTCCGATGGCCGAGGTGATTAT  
GCAGAAATCTGATGGTCAAGACGAGTCTCTACTGGGAGGTGGATAGTGCCGGTCTCAGGACATGGAACtggaca  
ACT [-9,+9]

CG2104-wt

GGCGTACTTTACTGATCACGTACTTGAACGATGTGAGCGCCGAGATACAGGGAATCCG  
CG2104-m1  
GGCGTACTTTACTGATCACGTACTTGAACGATGTGAGCGC-----AGGGAATCCG [-8]

CG31469-wt  
CACATGCCGGTCACCAATGGCCGAGGCCATACTGAAGCATTGGTAGTGAAACGGAATCTGCAGGACTGGT  
ATGTGGACAGTGTCTGGCCTCAGGAGTTGGAACGTTGGCCTGGAGCCCC  
CG31469-m1  
CACATGCCGGTCACCAATGGCCGAGGCCATACTGAAGCATTGGTAGTGAAACGGAATC**c**TGCAGGACTGG  
TATGTGGACAGTGTCTGGCCTCAGGAGTTGGAACGTTGGCCTGGAGCCCC [+1]

CG5361-wt GCAATGGTAACCACACAGCAGACCAAGGAGATTTGCGAAATTATTCGGCTGAAATCAAC  
CCAGGTGTTCC.....AGGTGGCGACCTCCAGAAAATCT.....AATCAGCAGGATTGCGGAAGGTTATTTAATG  
CAACGCAAGGCCCGATAAGCA  
CG5361-m1  
GCAATGG-----CGACCTCCAGAAAATCT.....AATCAGCA  
GGATTGCGGAAGGTTATTTAATGCAACGCAAGGCCCGATAAGCA [-189]  
CG5361-m2  
GCAATGGTAACCACACAGCAG-----GTGGCGACCTCCAGAAAATC  
T.....AATCAGCAGGATTGCGGAAGGTTATTTAATGCAACGCAAGGCCCGATAAGCA [-171]  
CG5361-m3  
GCAATGGTAACCACACAGCAGAGAAGTGTGGTTAAC-----  
--CTTCCTTGCGGAAGGTTATTTAATGCAACGCAAGGCCCGATAAGCA [-468]

CG6036-wt  
AGTCATCCATGAGTGAGTGGGATTTCTGTGTG.....TCATGGGAATGGGCTGCGATACTGCGTAAGTTCTATG  
CAAGGTTGGCGATTGGAATGGAGGATAGCCACTCGGCTGCTTGCCGGCTGAAGGATCCCTTCGCAACGT  
CG6036-m1  
AGTCATCCATGAGTGAGTGGG**gagtgggg**ATTTCTGTGTG.....TCATGGGAATGGGCTGCGATACTGCGTAAGT  
TCTATGCAAGGTTGGC-**Acc**TT-----CCACTCGGCTGCTTGCCGGCTGAAGGATCCCTTCGCAACGT [+10,  
-16]

CG13369-wt  
TAACAGACTACCCACAAGAGACTAGTGCAATTGCAGCAATGGCCCAAACGGAAGTGCTGGTGTTCGGCTCG  
GCCATCATTGACTTTATAAGGTAGGTGGGCAGAGAAGGCTCGATCCCAA  
CG13369-m1  
TAACAGACTACCCACAAGAGACTAGTGCAATTGCAGCAATGGCCCAAACGGAAGTGCTGGTGTTCGCTCGG  
CCATCATTGACTTTATAAGGTAGGTGGGCAGAGAAGGCTCGATCCCAA [-2]  
CG13369-m2  
TAACAGACTACCCACAAGAGACTAGTGCAATTGCAGCAATGGCCCAAACGGAAGTGCT-----CGGCCATC  
ATTGACTTTATAAGGTAGGTGGGCAGAGAAGGCTCGATCCCAA [-11]  
CG13369-m3  
TAACAGACTACCCACAAGAGACTAGTGCAATTGCAGCAATGGCCCAAACGGAAGTGCTGGTGTTCGCTCGG  
CATCATTGACTTTATAAGGTAGGTGGGCAGAGAAGGCTCGATCCCAA [-3]

CG2577-wt  
TCCACAGTGGGGAGCGGGTGGCCATCAAGGTGGAAGCAGCAAGGTGCGCCATCCGCAGCTCAACTA.....  
AGGCCCGCCACGGTTTGCCAAGGATTAGGTACTTCCACAAGGAGGAGCACTACCAGGCGATGGTTATGGA  
TCTGC  
CG2577-m1  
TCCACAGTGGGGAGCGGGTGG-----GG-GA-G-----  
-----CGATGGTTATGGATCTGC [-124]

CG32649-wt  
GGAATCGGCCATCTCTGAGCCTGCACAAGTCTCCTCAATTCGTAAATCCACACC  
CG32649-m1  
GGAATCGGCCATCTCTGAGCCTGCACAAGTCTCCTCAAG**tcctcc**TCGTAAATCCACACC [+6]

CG32687-wt  
AGGAGAAGATCAGCCATGGAGGTGTACACGTCGGACAGTTTCGGACACGGATTTCGGGGAGCAGAAGACAC  
TGGACTTTGGCGTATGAGCCTGGACCTGGTACGCTGGAGGATCACCTGGCTCGCCGAGAAGGCTCT  
CG32687-m1  
AGGAGAAGATCAGCCATGGAGGTGTACACG-----CTGGA  
GGATCACCTGGCCTCGCCGAGAAGGCTCT [-75]  
CG32687-m2

AGGAGAAGATCAGCCATGGA-----CACGCTGGtGGAT  
CACCTGGCCTCGCCGCAGAAGGCTCT [-82,+1]

CG32687-m3

AGGAGAAGATCAGCCATGGAGGTGTACACG-----CCTGGACCTGGT  
CACGCTGGAGGATCACCTGGCCTCGCCGCAGAAGGCTCT [-59]

CG32687-m4

AGGAGAAGATCAGCCATGGAGGTGTACACGTGGACtgtAcacGTTTCGGACACGGATTTCGCGGGAGCAGAAG  
ACACTGGACTTTGGCCGTAT-AGCCTGGACCTGGTCACGCTGGAGGATCACCTGGCCTCGCCGCAGAAGGC  
TCT [+6,-1]

CG4041-wt

AATTCCACACGTGCCAAGATTACAGATTCATCTACGGATAAACTACTAATTCCACGACTGCC.....GAGTAT  
CTGGGACTCTACTGGAGGACTACGCCATGCGTCATCCACCGCTGGCCATTGC

CG4041-m1

AATTCCACACGTGCCAAGATCACAGATTCATCTACGGATAAACTACTAATTCCA-G--TGCC.....GAGTATC  
TGGGACTagTCACTGGAGGACTACGCCATGCGTCATCCACCGCTGGCCATTGC [-4,+2]

CG4041-m2

AATTCCACACGTGCCAAGATCACAGATTCATCTACGGATAAACTACTAATTCCA-G--TGCC.....GAGTATC  
TGGGA--TCACTGGAGGACTACGCCATGCGTCATCCACCGCTGGCCATTGC [-6]

CG8173-wt

ATCAACGTGCCGCCATCGCCGATGATGAAGACCCTGGGCCACGGCACTGGGATCCGGGTCTACCGCTTGG  
ACCGCTCGCCTCGTCTCGGCGAAATCCGCTCGCCCTGGGCCGTCAAG

CG8173-m1

ATCAACGTGCCGC-----TCGCCTCGTCTCGGCGAAATCCGCTCGC  
CCTGGGCCGTCAAG [-62]

CG8173-m2

ATCAACGTGCCGCCATCGCCGATGATGAAGACCCTGGGCCACGGCACTGGGA-----CCGCTCGCC  
TCGTCTCGGCGAAATCCGCTCGCCCTGGGCCGTCAAG [-19]

CG8173-m3

ATCAACGTGCCGCCATCGCCGATGATGAAGACCCTGGGCCACGGCACTGGGATCCGGG  
TCTACCGCTTGGACCGCTCGCCTCGTCTCGGCGAAATCCGCTCGCCCTGGGCCGTGgcctcgtctcggcgaaatccg  
ctcgcctggAAG [+31]

CG8173-m4

ATCAACGTGCCGCCATCGCCGATGATGAAGACCCTGGGCCACGGCACTGGGATCCGGGTCTAC---TTGGAC  
CGCTCGCCTCGTCTCGGCGAAATCCGCTCGCCCTGGGCCGTCAAG [-3]

CG8565-wt

GCTCTCCGATGATGGAATTGCCGGCAGAAAGCCGGCCAAAATTAATAAGTATAGCGAACTTAGC

CG8565-m1

GCTCTCCG-----GCCAAAATTAATAAGTATAGCGAACTTAGC [-26]

CG8565-m2

GCTCggaGATGAT---TcGCCG--Attc-GCCGGCCAAAATTAATAAGTATAGCGAACTTAGC [-14,+7]

CG8565-m3

GCTCTCCGATGA-----GCCGGCCAAAATTAATAAGTATAGCGAACTTAGC [-18]

CG15743-wt

TCCATCAGGAGGAGCGGCCAGCGATCTACGGCATGCTGCGCAGTGAGAATCCCAGCCGCG

CG15743-m1

TCCATCAGGAGGAGCGGCCAGCGA-CTACGGCATGCTGCGCAGTGAGAATCCCAGCCGCG [-1]

CG1637-wt

ATCTGTCTTTGGAGGTGAGTGCGATCTTCTTTACTTTTTCGCATTATGTAAATTGCTCAC

CG1637-m1

ATCTG-----AGGTGAGTGCGATCTTCTTTACTTTTTCGCATTATGTAAATTGCTCAC [-8]

CG1637-m2

ATCT-----TTGGAGGTGAGTGCGATCTTCTTTACTTTTTCGCATTATGTAAATTGCTCAC [-5]

CG17598-wt

GTGCGGCCATCATCGTGCCGCGGGACATCAACCTACTGCCCTGGGGCACCGGATACGCC

CG17598-m1

GTGCGGCCATCATCGTGCCGCGGGACATCAACCTACTG----GGGCACCGGATACGCC [-5]

CG17598-m2

GTGCGGCCATCATCGTGCCGCGGGAC-----CCTGGGGCACCGGATACGCC [-13]

CG32812-wt

TCGTCAGCTCAACCCCGTCCAACGTGTGTACCACCAGCAGGCCACAGGGCTGTCCGC

CG32812-m1

TCGTCAGCTCAACCgtGTgaCCAACCTGTGTGACCACCAGCAGGCCACAGGGCTGTCCGC [-2,+5]

CG32812-wt

CCTACGTTCCATTGGGATTAATCGAATCCGTACAGGTGCGAGATCTGTTCCAGCTGATTG

CG32812-m1

CCTACGTTc-AcTGGGATTAATCGAATCCGTACAGGTGCGAGATCTGTTCCAGCTGATTG [-2,+1]

CG42271-wt

TTGGTGTAAGTGCCTGGAAATTTACTGTTCTACCTCAAGGATAAGGACCCCAAGTCAGCGGTGGCCGGCC  
TCCTGGTGCTGGAGAAGTGCCTGCGCGCATTGAGAATGAGGAGCGTGA

CG42271-m1

TTGGTGTAAGTGCCTGGAAATTTACTGTTCTACCTCAAGGATAAGGACCC-----CAGCGGTGGCCGGCCTC  
CTGGTGCTGGAGAAGTGCCTGCGCGCATTGAGAATGAGGAGCGTGA [-4]

CG42271-m2

TTGGTGTAAGTGCCTGGAAATTTACTGTTCTACCTCAAGGATAAGGACCC-----GGCCTCCTGGTGC  
TGGAGAAGTGCCTGCGCGCATTGAGAATGAGGAGCGTGA [-16]

CG42271-m3

TTGGTGTAAGTGCCTGGAAATTTACTGTTCTACCTCAAGGAT-----T  
CAGAATGAGGAGCGTGA [-59]

CG7378-wt

AACAGACCACAGGCCCGCCAGCTGCAGCGAGTCCTGCACTACTCGATGGCTCCTAGCCG.....TTGATGGGCA  
TCACCCACGTTCTGAACGCGGCCGAGGGATGTCGGTATGGTCAGGTGGAC

CG7378-m1

AACAGACCACAGGCCCGCCAGCTGCAGCGAGTCCTGCACTACTCGATGGCTCCTAGCCG.....TTGATGGGCA  
TCACCCACGTTCTGAACGCGGCCGAGGGATGTCGGTATGGT-----GGAC [-5]

CG7378-m2

AACAGACCtccCAGGCCCGCCAGCTGCAGCGAGTCCTGCACTACTCGATGGCTCCTAGCCG.....TTGATGGGCA  
ATCACCCACGTTCTGAACGCGGCCGAGGGATGTCGGTATGG-----AC [-9,+3]

CG9784-wt

TCCGTGGACGCACAAGGCTAAGGAACTGCTACGCAACTACGACTATGTGGCCGTAAAGAC

CG9784-m1

TCCGTGGA-----AG--TAAGGAACTGCTACGCAACTACGACTATGTGGCCGTAAAGAC [-8]

## Supplementary Note 2. Detailed sequences for abnormal lethal events.

Note: wt, wild-type DNA/protein sequence; m#, mutation line# DNA/protein sequence. Deletions are shown as red dashes and insertions as highlighted in blue and lowercase letters. The change of DNA length (in nucleotides) caused by each mutation is indicated as purple (+, insertion; -, deletion). Note that some alterations have both insertions and deletions of nucleotides and in these cases the alterations are enumerated in the brackets. The DNA sequences are followed by the corresponding protein sequences. All DNA/protein sequences were obtained from the flybase website (flybase.org) and the alignments were performed by CLUSTALW.

CG12229-**wt** DNA sequence

ATG.....GGACACCATGAACATTGCGATATCGGCGCATTCTGCAGAGAGGGAACTACGTCTGACAACTGGCT  
TGGCTCTGGAGATTAACGGCGAGTGCTGTGCGGTTGGGAGACTGAGGAACAACCTGCACC

CG12229-**m1(viable)** DNA sequence

ATG.....GGACACCATGAACATTGCGATATCGGCGCATTCTGCAGAGAGGGAACTACGTCT----ACTGGCTTG  
GCTCTGGAGATTAACGGCGAGTGCTGTGCGGTTGGGAGACTGAGGAACAACCTGCACC [-4]

CG12229-**m2(lethal)** DNA sequence

ATG.....GGACACCATGAACATTGCGATATCGGCGCATTCTGCAGAGAGGGAACTACGTCTGg--AACTGGCTT  
GGCTCTGGAGATTAACGGCGAGTGCTGTGCGGTTGGGAGACTGAGGAACAACCTGCAC [-3,+1]

CG12229-**wt** protein sequence

MPINQKEVTPQLDSQTGEDQGEESQPEDENRLEKFTVRLNGQHDLEQRLKDFKAACEAHEKHARRRKRKRY  
HLGLVAKLVTETTHDELRRMLENGTYTFHVDTVGNKPDELKAILDTMNIASAHSAERELRLTGLALEINGECCRV  
G.....

CG12229-**m1(viable)** protein sequence

MPINQKEVTPQLDSQTGEDQGEESQPEDENRLEKFTVRLNGQHDLEQRLKDFKAACEAHEKHARRRKRKRY  
HLGLVAKLVTETTHDELRRMLENGTYTFHVDTVGNKPDELKAILDTMNIASAHSAERELRLLAWLWRLTASAV  
LD\*

CG12229-**m2(lethal)** protein sequence

MPINQKEVTPQLDSQTGEDQGEESQPEDENRLEKFTVRLNGQHDLEQRLKDFKAACEAHEKHARRRKRKRY  
HLGLVAKLVTETTHDELRRMLENGTYTFHVDTVGNKPDELKAILDTMNIASAHSAERELRLELAWLWRLTASAV  
LGD\*

CG17027-**wt** DNA sequence

AGTAAAAACGTCTCAATCAAAGGCGATTTCTACGACGTGGTCACCGACTACGACAACAAGATTGAGGACTTT  
CTCATGGAGAAAATATTGGCCAGATACCCGGATCACAAGTTCATCGGCGAGGAGGAGACGGCTAAGAACA  
CAACGTGT

CG17027-**m1(viable)** DNA sequence

AGTAAAAACGTCTCAATCAAAGGCGATTTCTACGACGTGGTCACCGACTACGACAACAAGATTGAGGACTTT  
CTCATGGAGAAAATATTGGCCAGAT-----CACAAGTTCATCGGCGAGGAGGAGACGGCTAAGAACAACA  
ACGTGT [-8]

CG17027-**m2(lethal)** DNA sequence

AGTAAAAACGTCTCAATCAAAGGCGATTTCTACGACGTGGTCACCGACTACGACAACAAGATTGAGGACTTT  
CTCATGGAGAAAATATTGGCCAGAT-----CACAAGTTCATCGGCGAGGAGGAGACGGCTAAGAACAACA  
ACGTGT [-8]

CG17027-**wt** protein sequence

MAGVSQADIEELYNFIHPLAIKAGEILMEGYEMASKNVSIGDFYDVVTDYDNKIEDFLMEKILARYPDHKFIGE  
E.....

CG17027-**m1(viable)** protein sequence

MAGVSQADIEELYNFIHPLAIKAGEILMEGYEMASKNVSIGDFYDVVTDYDNKIEDFLMEKILARSQVHRRGGD\*

CG17027-**m2(lethal)** protein sequence

MAGVSQADIEELYNFIHPLAIKAGEILMEGYEMASKNVSIGDFYDVVTDYDNKIEDFLMEKILARSQVHRRGGD\*

CG17028-**wt** DNA sequence

AGGAAGTGCGGTCCGCTC.....ATCATAGATCCCATTGATGGCA

CG17028-**m1(lethal)** DNA sequence

AGGAAGTGCGGTCCGCTC---.....ATGGGACCGGTCCGGTCATC.....---ATCATAGATCCCATTGATGGCA [-1,  
81]

CG17028-**m2(lethal)** DNA sequence

AGGAAGTGCGGTCCGCTC.....ATCATAGATCCCATTGATGGCA [0]

CG17028-**wt** protein sequence

MSYRIGEEKLEVYYQVSLELVRKCGPLFLEGFQKPKTDYEVKSAFYDLVTVYDKQIEATLTDGLLKTFPESKIIGEE  
AMANAKTPELTDAPTWIIDPIDGTNNYVRKIPHCISVGLAINKE.....

CG17028-**m1** (**lethal**) protein sequence

MSYRIGEEKLEVYYQVSLELVRKCGPLMGPVRRSSS\*

CG17028-**m2** (**lethal**) protein sequence

MSYRIGEEKLEVYYQVSLELVRKCGPLFLEGFQKPKTDYEVKSAFYDLVTVYDKQIEATLTDGLLKTFPESKIIGEE  
AMANAKTPELTDAPTWIIDPIDGTNNYVRKIPHCISVGLAINKE.....
